1 **TITLE:** PRESCRIBING PRACTICES AND CLINICAL IMPACT OF NEXT GENERATION  
2 SEQUENCING IN ROUTINE PRACTICE IN SOLID TUMORS – REAL WORLD  
3 EXPERIENCE IN LMIC

4 **SHORT TITLE:**

5 PRESCRIBING PRACTICES AND CLINICAL IMPACT OF NGS IN SOLID TUMORS:  
6 REAL-WORLD LMIC EXPERIENCE

7  
8 **AUTHOR'S NAME:**

9  
10 ADEEBA ZAKI<sup>1</sup>

11 NIDA E ZEHRA<sup>1</sup>

12 AQSA SOHAIL<sup>1</sup>

13 ZEESHAN ANSAR<sup>1</sup>

14 MUNIRA MOOSAJEE<sup>1</sup>

15  
16 <sup>1</sup>DEPARTMENT OF ONCOLOGY, THE AGA KHAN UNIVERSITY HOSPITAL,  
17 KARACHI, PAKISTAN

18  
19 **CORRESPONDING AUTHOR:**

20 EMAIL: [adeeba.zaki@aku.edu](mailto:adeeba.zaki@aku.edu)

21  
22  
23 **AUTHORS CONTRIBUTION:**

24 ALL AUTHORS CONTRIBUTED EQUALLY TO THIS WORK

## 25 **Abstract**

26 Molecular characterization of disease is essential for precision medicine due to novel predictive  
27 biomarkers. Multiple next-generation sequencing (NGS) platforms are available, but their  
28 expense and clinical utility vary. Even if a targetable mutation is detected, corresponding drugs  
29 may not be available or affordable. No prior studies in Pakistan have focused on integrating NGS  
30 results into patient care to assist with therapeutic decision-making and survival outcomes.

31 This retrospective study aimed to evaluate the molecular profiling and therapeutic implications  
32 of NGS testing across solid tumors. It included all patients with histologically proven  
33 malignancy (metastatic or non-metastatic) who had NGS analysis at Aga Khan University  
34 Hospital (AKUH) from June 1, 2020, to June 1, 2023. Foundation One was the NGS platform  
35 used. From 2020 to 2023, 192 patients underwent NGS. The majority were male (55.2%) and  
36 aged over 50 years (71.9%). The most common indications for NGS were carcinoma of unknown  
37 primary (CUP) and lung cancers, representing 26% and 25% respectively, followed by colon  
38 (9%) and breast cancers (8%). Most patients had metastatic disease (98.4%). Common mutations  
39 in lung cancer were EGFR (16.3%) and KRAS G12C (14.3%). In unknown primary, breast, and  
40 colon cancers, the most common mutations were BRAF (8%), PIK3CA (18%), and KRAS  
41 (42.1%), respectively. Microsatellite instability (MSI) testing was performed in 95% of patients,  
42 with 6% being MSI high. Actionable alterations were detected in 31.8% of patients, but only  
43 17.2% received genotype-matched treatment, mostly as a first-line treatment for lung cancer. The  
44 primary barriers were drug availability and affordability.

45 Our results show that the implementation of NGS analysis supports clinical decision making.  
46 However, these results were applicable to a small percentage of patients. For better compliance  
47 and applicability, drug availability and cost of treatment needs to be addressed  
48 Keywords: Next generation sequencing, lung cancer, mutation, drug.

## 49 **Introduction**

50 Cancer is a heterogenous disease. Presence of subpopulation of tumour cells with distinct  
51 genotype and phenotype leads to divergent biological behavior within a primary tumor and its  
52 metastases, or between tumors of the same histopathological subtype [1]. Genetic variations in  
53 both the cancer and inherited genomes are informative for hereditary cancer risk, prognosis, and  
54 treatment strategies. Given the increasing number of potential targets for cancer therapies, novel  
55 applications have been developed that provide information about the tumour genome to guide  
56 therapeutic selection. The application of genetic information to assist with the clinical  
57 management of patients with cancer is rapidly expanding into routine care [2].

58 There are numerous genetic testing platforms that can guide cancer care from single gene testing  
59 by PCR (polymerase chain reaction) or FISH (Fluorescence in situ hybridization) to  
60 comprehensive next generation sequencing. Next generation sequencing (NGS) allows rapid  
61 simultaneous sequencing of DNA or RNA samples with a higher sensitivity and provides  
62 prognostic information on sensitivity or resistance to drugs [3]. Sequencing applications, both  
63 genome-wide and targeted, are revealing complex mutational signatures associated with different  
64 types of cancers that are now driving both research and therapeutic decisions [4].

65 Studies have evaluated the decision impact of molecular profiling on treatment and their effect  
66 on overall survival [5].

67 Studies have evaluated the cost and impact of NGS use at national level on treatment  
68 modification and survival [6]. Jones et al. report a statistically significant difference in survival  
69 for patients who showed actionable alterations with subsequent targeted therapy in comparison  
70 with patients who, despite showing actionable alterations, did not receive targeted therapy and  
71 patients who did not show any actionable alterations on NGS testing in gynecological  
72 malignancies [7]. In advanced breast cancer clinical application of NGS, real world data revealed  
73 that only 4.7% of patients received molecular guided therapy [8].

74 In resource limited countries, routine use of NGS testing is not possible due to cost and  
75 availability of testing facility and subsequent drugs. Therefore, we felt that it was essential to  
76 evaluate the prescribing practices of NGS in solid malignancies with a focus on the clinical  
77 impact of NGS results in patient care to assist with therapeutic decision making. To our  
78 knowledge this is the first study evaluating molecular profiling and its therapeutic implication  
79 across solid tumors in Pakistan

## 80 **Material and Methods**

### 81 **Patients and sample**

82 For this retrospective observational study, all the patients with histologically proven malignancy  
83 in whom tumor genomic profiling test ordered from June 2020 till June 2023 were included.

84 There were no limitations for tumor type, treatment line, metastatic vs non- metastatic disease,  
85 performance status or organ function. Patients were tested with either Foundation One CDx test,  
86 in house targeted hotspot panel (limited gene testing) via PCR or FISH and/ or Microsatellite  
87 instability (MSI) testing by PCR. Foundation One CDx, sequences genes from solid tumor tissue  
88 sample and reporting the detected alteration (mutation, amplification, deletion, fusion and also  
89 tumor mutational burden) along with suggested targeted therapies against each detected  
90 alteration.

91 For this retrospective study, the need for individual patient consent was waived by the ethics  
92 committee due to the use of de-identified data. All data were anonymized to ensure  
93 confidentiality and privacy. As the study involved the analysis of previously collected data, the  
94 ethics committee waived the requirement for obtaining new written or verbal consent from  
95 participants. When the genomic profiling tests were initially ordered, patients provided informed  
96 written consent to have data from their medical records used in research. The study protocol,  
97 including the waiver of consent, was reviewed and approved by the ethics committee of The Aga  
98 Khan University and considered under exempted study, ensuring that all ethical considerations  
99 were addressed.

## 100 **Statistical Analysis:**

101 Data was analyzed using STATA 16.0. Mean and Standard Deviation or median and intra  
102 quartile range (IQR) were calculated for quantitative continuous variables based on the normality  
103 of the variables. Frequency and percentages were calculated for categorical variables.

104 Confounders were controlled through stratification; post stratification Chi-square test was  
105 applied. Cox proportional hazard regression was used for multivariable analysis to determine the  
106 influence of the following variables: matched and nonmatched treatment given before and after  
107 NGS analysis, line of treatment at NGS analysis on survival for the total population. A p-value of  
108 less than and equal to 0.05 was considered as statistically significant.

109 **Results:**

110 367 patients underwent genomic profiling from June 2020 to June 2023 at the Aga Khan  
111 University Hospital. Clinical and demographic characteristics of patients.

112 192 patients underwent genomic (Next generation sequencing) testing via Foundation One CDx  
113 panel (FMI). 13 had limited targeted hotspot testing and 162 had MSI testing alone. Majority  
114 were male (58.8%) while 41% were female. On age stratification, FMI testing was done mostly  
115 in patients who were > 50 years while MSI alone was done in patients between 30-50 years  
116 presenting predominantly with non-metastatic malignancy. 22 malignancies were found in which  
117 NGS and MSI was advised by treating physician.

118 The most common indication was carcinoma of unknown primary (CUP) and lung cancer  
119 representing 26 % and 25% respectively. This was followed by colon cancer (9%), breast cancer  
120 (8%).MSI testing was done solely as an only hotspot test in around 44% of patients, mostly those  
121 with colon cancer. Inhouse targeted hotspot test was offered in 13 patients, mostly done in  
122 patients with colon cancer. Majority of patients had metastatic disease. NGS testing was  
123 recommended in first line of treatment after the diagnosis in majority of the patients. Actionable  
124 alterations were detected in 31.8% of which only 17.2% patients received genotype-matched  
125 treatment. This was most commonly done in first line treatment for lung cancer. Table 1

126

127

128

129 **Table 1: Demographics**

|                           | <b>NGS -FMI<br/>(N=192) %</b> | <b>MSI- AKU<br/>(N=162) %</b> | <b>NGS -AKU<br/>(N=13) %</b> |
|---------------------------|-------------------------------|-------------------------------|------------------------------|
| <b>Age (Yrs.)</b>         |                               |                               |                              |
| <30                       | 9 (4.7%)                      | 10 (6.2%)                     | 0                            |
| 30-50                     | 45 (23.4%)                    | 103 (63.6%)                   | 5 (38.5%)                    |
| >50                       | 138 (71.9%)                   | 49 (30.2%)                    | 8 (61.5%)                    |
| <b>Sex</b>                |                               |                               |                              |
| Female                    | 86 (44.8%)                    | 60 (37.0%)                    | 5 (38.5%)                    |
| Male                      | 106 (55.2%)                   | 102 (63.0%)                   | 8 (61.5%)                    |
| <b>Primary malignancy</b> |                               |                               |                              |
| Bone cancer               | 2 (1.0%)                      | -                             |                              |
| Breast cancer             | 16 (8.3%)                     | -                             | 1 (7.7%)                     |
| Cervical cancer           | 3 (1.6%)                      | -                             |                              |
| Colon cancer              | 19 (9.9%)                     | 80 (49.4%)                    | 10 (76.9%)                   |
| Esophageal cancer         | 3 (1.6%)                      | 7 (4.3%)                      |                              |
| Gall Bladder cancer       | 4 (2.1%)                      | 5 (3.1%)                      |                              |
| gastric cancer            | 1 (0.5%)                      | 12 (7.4%)                     |                              |
| Head and Neck cancer      | 2 (1.0%)                      | -                             |                              |
| Kidney Cancer             | 1 (0.5%)                      | -                             |                              |
| Lung cancer               | 49 (25.5%)                    | -                             |                              |
| Melanoma                  | 1 (0.5%)                      | -                             | 1 (7.7%)                     |
| Ovarian cancer            | 4 (2.1%)                      | 2 (1.2%)                      |                              |
| Pancreatic cancer         | 13 (6.8%)                     | 7 (4.3%)                      | 1 (7.7%)                     |
| Prostate cancer           | 4 (2.1%)                      | 5 (3.1%)                      |                              |
| Rectal cancer             | 4 (2.1%)                      | 36 (22.2%)                    |                              |
| Skin cancer               | 1 (0.5%)                      | -                             |                              |
| Soft Tissue sarcoma       | 5 (2.6%)                      | -                             |                              |
| Thyroid cancer            | 3 (1.6%)                      | -                             |                              |
| Unknown primary           | 50 (26.0%)                    | -                             |                              |
| Urothelial cancer         | 1 (0.5%)                      | -                             |                              |
| Uterine cancer            | 6 (3.1%)                      | 7 (4.3%)                      |                              |
| Neuroendocrine Tumor      | -                             | 1 (0.6%)                      |                              |



|                                                         |             |             |            |
|---------------------------------------------------------|-------------|-------------|------------|
| <b>Stage</b>                                            |             |             |            |
| Metastatic                                              | 189 (98.4%) | 104 (64.2%) | 13 (100%)  |
| Non-metastatic                                          | 3 (1.6%)    | 58 (35.8%)  | 0          |
| <b>Line of treatment (At the time of NGS)</b>           |             |             |            |
| First                                                   | 187 (97.4%) | 153 (94.4%) | 13 (100%)  |
| Second                                                  | 5 (2.6%)    | 9 (5.6%)    | 0          |
| <b>MSI testing</b>                                      | 183 (95.3%) |             |            |
| <b>MSI-H</b>                                            | 6 (3.2%)    | 27 (16.7%)  | -          |
| <b>MSS</b>                                              | 177 (96.7%) | 135 (83.3%) | -          |
| <b>Tumour mutational burden</b>                         |             |             |            |
| <10 Muts/Mb                                             | 123 (64.1%) | -           | -          |
| >10 Muts/Mb                                             | 23 (12.0%)  | -           | -          |
| 0 Muts/Mb                                               | 46 (24.0%)  | -           | -          |
| <b>Actional alteration</b>                              | 61 (31.8%)  | -           | 3 (23.07%) |
| <b>No Alteration (Wild type)</b>                        | 131 (68.2%) | -           | 10 (76.9%) |
| <b>Genotype matched treatment</b>                       |             |             |            |
| N/A                                                     | 3 (1.6%)    | -           |            |
| No                                                      | 156 (81.3%) | 113 (69.7%) | 12 (92.3)  |
| Yes                                                     | 33 (17.2%)  | 49 (30.2%)  | 1 (7.6%)   |
| <b>Line of treatment (first/second/third or beyond)</b> |             |             |            |
| First Line                                              | 17 (8.9%)   | 35 (21.6%)  | 1 (7.6%)   |
| N/A                                                     | 157 (81.8%) | -           | -          |
| Second line                                             | 18 (9.4%)   | 14 (8.6%)   | -          |

130

## 131 GENOMIC LANDSCAPE

### 132 MSI testing

133 MSI testing was done as a part of Foundation one CDx panel and also as a targeted hotspot test

134 via PCR at institute. Most common indication was colon cancer (49%) followed by rectal cancer

135 (22%) and gastric cancer (7%). In colon cancer, 28.7% patients are found to have MSI -H while  
136 71.2% are MSS and most commonly performed in stage II colon cancer. In rectal cancer  
137 majority of the patients were MSS (92%) and mostly done in metastatic disease. Matched  
138 treatment according to instability testing was given in all patients with colon cancer. MSI testing  
139 in patients other than colon cancer was done in metastatic presentation. Table 2

140 **Table 2: MSI testing MSI (N=162)**

| Primary malignancy   | MSI testing No. (%) | MSI-H No. (%) | MSS No. (%) | Matched treatment No. (%) |
|----------------------|---------------------|---------------|-------------|---------------------------|
| Colon cancer         | 80 (49.4%)          | 23 (28.7%)    | 57 (71.2%)  | 46 (93.9%)                |
| Esophageal cancer    | 7 (4.3%)            | 1 (14.2%)     | 6 (85.7%)   | 2 (4.1%)                  |
| Gall Bladder cancer  | 5 (3.1%)            | 5 (100%)      | 0 (0%)      | 0 (0%)                    |
| Gastric cancer       | 12 (7.4%)           | 1 (8.3%)      | 11 (91.6%)  | 1 (2.0%)                  |
| Ovarian cancer       | 2 (1.2%)            | 0 (0%)        | 2 (100%)    | 0 (0%)                    |
| Pancreatic cancer    | 7 (4.3%)            | 0 (0%)        | 7 (100%)    | 0 (0%)                    |
| Prostate cancer      | 5 (3.1%)            | 0 (0%)        | 5 (100%)    | 0 (0%)                    |
| Rectal cancer        | 36 (22.2%)          | 1 (2.7%)      | 35 (97.2%)  | 0 (0%)                    |
| Uterine cancer       | 7 (4.3%)            | 1 (14.2%)     | 6 (85.7%)   | 0 (0%)                    |
| Neuroendocrine tumor | 1 (0.6%)            | 0 (0%)        | 1 (100%)    | 0 (0%)                    |

141  
142 **Cancer types and molecular targets and implication on treatment.**  
143 22 different cancers genomic profiling were studied. Most common were the Lung cancer,  
144 carcinoma of unknown primary, breast and colon cancer. Each with different demographic  
145 details, genomic alteration (either targetable or non-targetable), line of treatment and matched

146 treatment as per result. Most actionable alteration were detected in lung cancer. Mostly the  
147 patients had upfront testing when diagnosed with metastatic disease.

148 49 patients with lung cancer, 50 with carcinoma of unknown primary, 16 with breast cancer, 92  
149 patients with colon cancer underwent NGS (Foundation one) testing. In all cancer type mostly  
150 patients were male expect those with breast cancer with age greater than 50 years. Most common  
151 mutation detected in lung cancer was EGFR Exon 19 deletion (16.3%), KRAS- G12C  
152 amplification (14.3%), ERBB amplification (8.2%) followed by EGFR L858R, CDK 4  
153 amplification, BRAF. (Graph 1). Common mutation in carcinoma of unknown primary were  
154 BRAF/ MYC amplification (8%), CDK-4 amplification (8%) followed by EGFR amplification,  
155 NF-1 loss (6%). (Graph 2). In breast cancer, common mutation was PIK3CA amplification,  
156 PTEN (18%) followed by BRCA 2 (12.5%) and BRCA 1 (6.3%) (Graph 3). And in colon cancer  
157 common mutation detected were KRAS and TP53 (42.1%) followed by TP53 alone (26.3%). All  
158 the patients were Microsatellite stable (MSS) with Tumor mutational burden (TMB) < 10  
159 mut/Mb. Only 10.5% of the patients were MSI-H in colon cancer. (Graph 4).

160 Actionable mutation was detected in 30%, 16%, 37% and 47% in lung, carcinoma of unknown  
161 primary, breast cancer and colon cancer respectively. Genotype matched treatment was received  
162 in 30%, 6%, 12.5% and 36% respectively. Most likely limitation for not receiving genotype  
163 matched treatment was due to non – availability of drug and non-affordability.

164 Graph 1: Molecular Alteration detected in NGS – Lung cancer

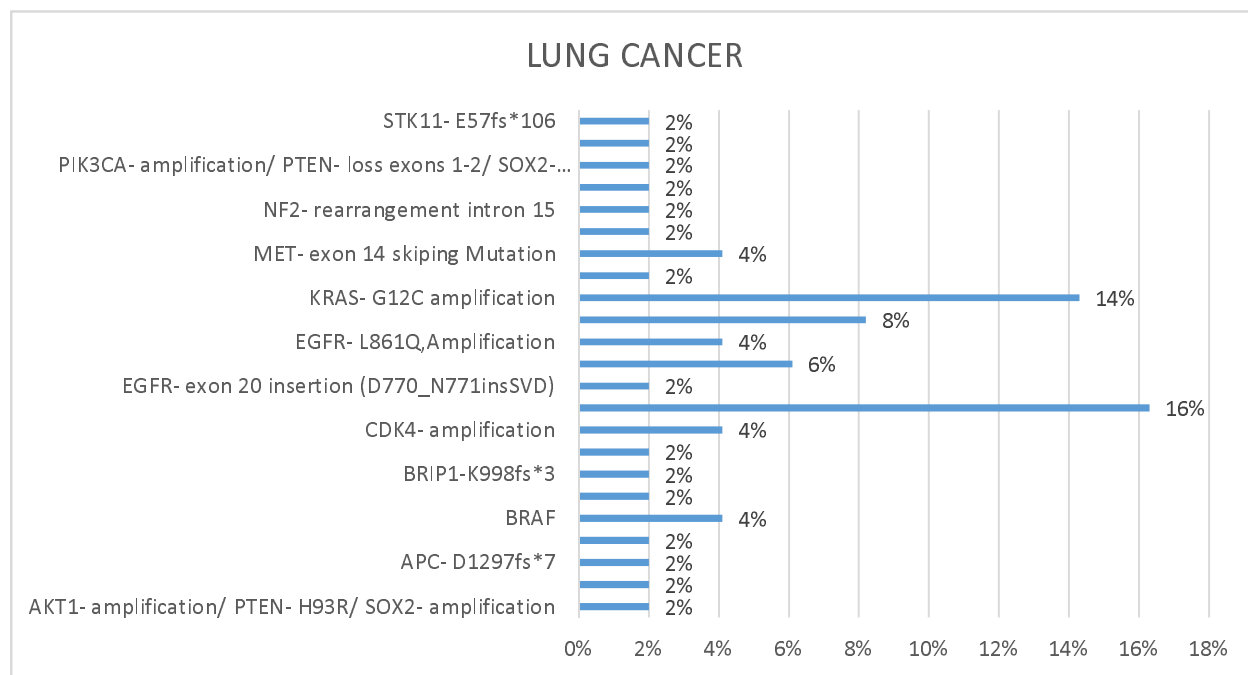

165

166 Graph 2: Molecular Alteration detected in NGS- Carcinoma of Unknown Primary.

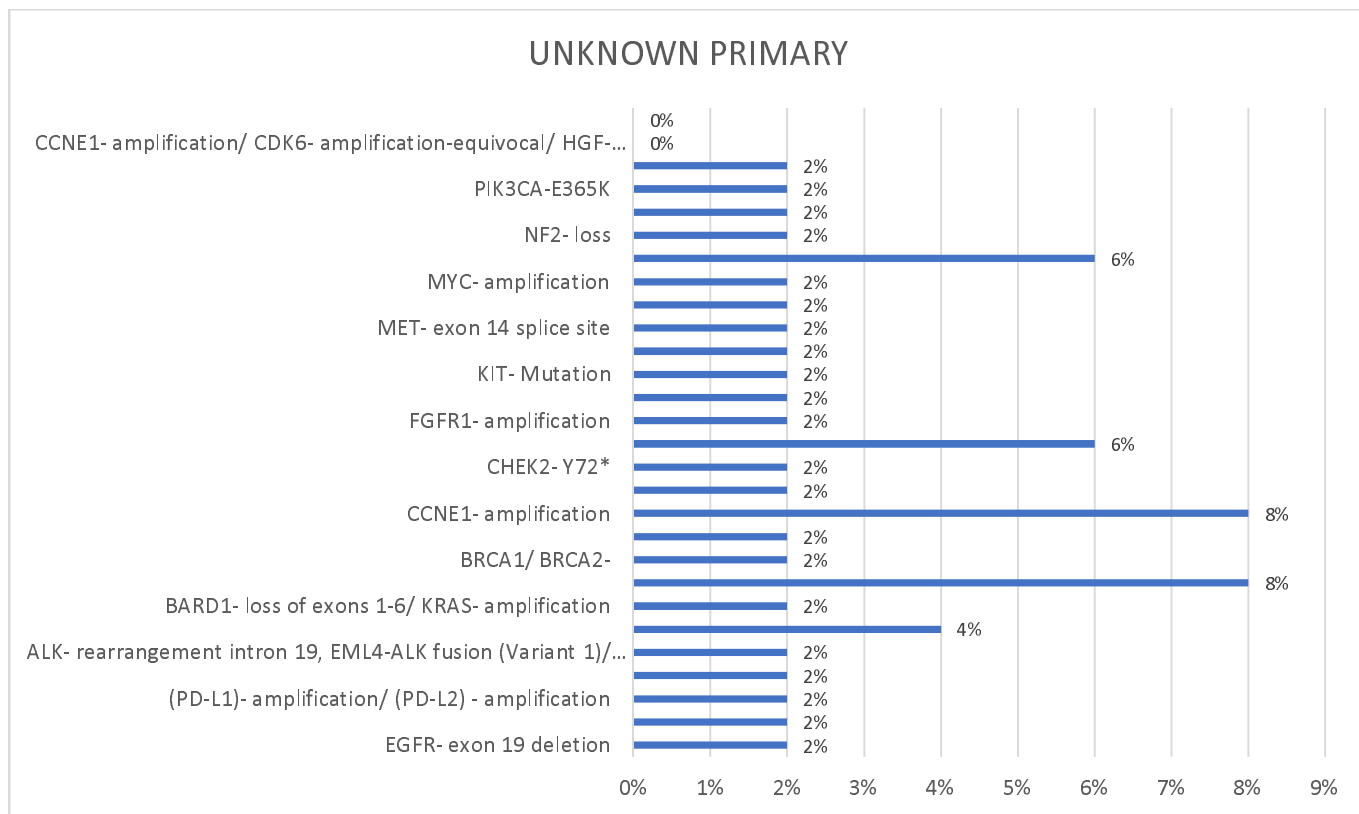

167

168 **Graph 3: Molecular Alteration detected in NGS- Breast Cancer**

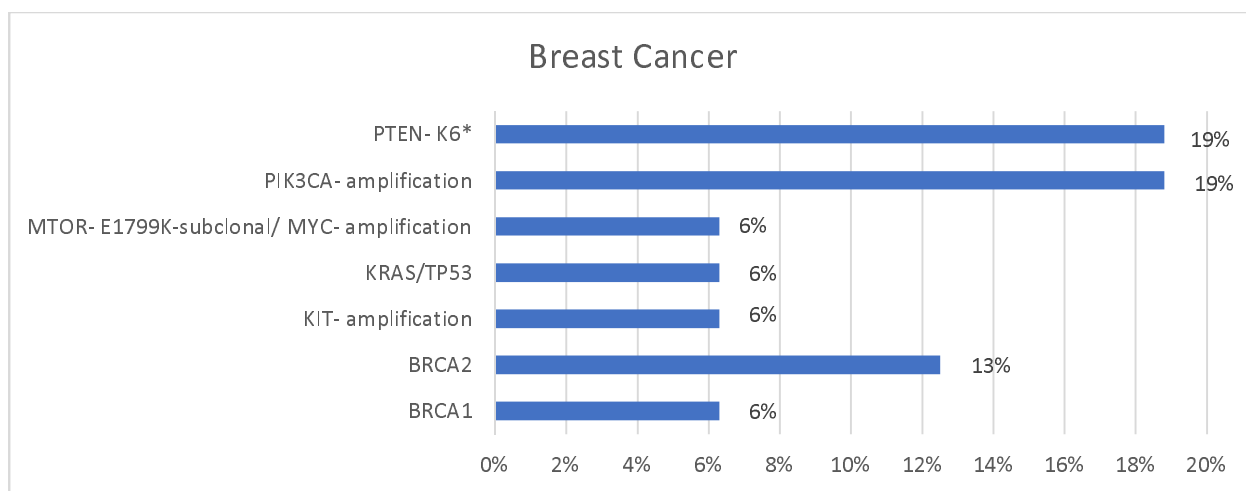

169

170

171 **Graph 4: Molecular Alteration detected in NGS- Breast Cancer**

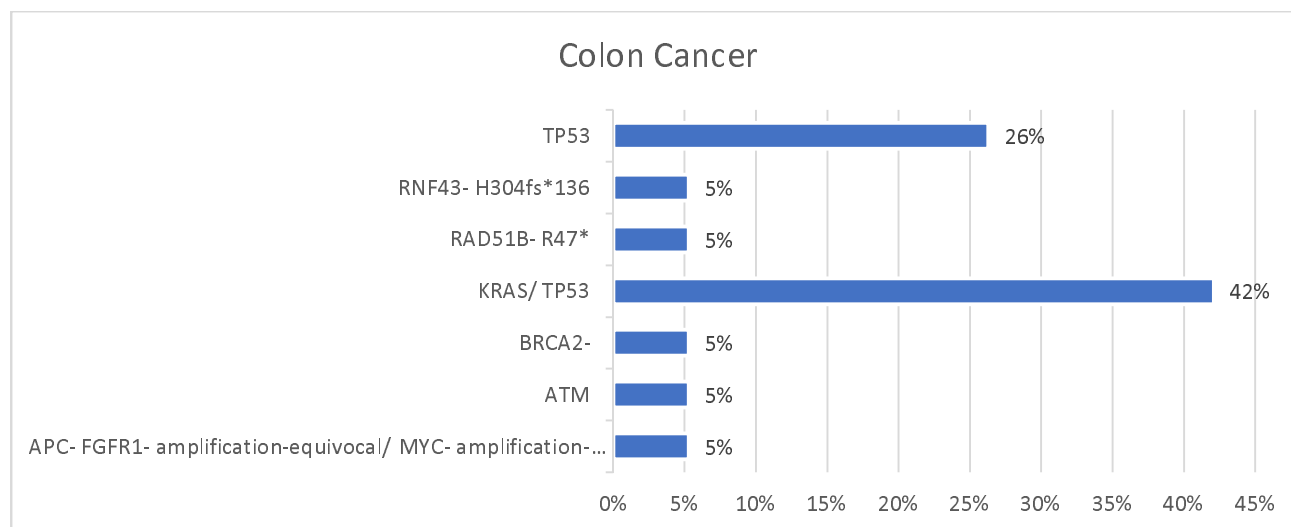

172

173 **Other cancer types:**

174 17 other different cancers genomic profiling were studied. No actionable mutation was detected  
 175 in majority of cancer. While in other cancers like esophageal cancer (3 patients), Gall bladder  
 176 cancer (4 patients), rectal cancer (4 patients), skin cancer (1 patient), thyroid cancer (3 patients)  
 177 and uterine cancer (6 patients), in which actionable alteration were detected but no genotype  
 178 matched treatment was given mainly due to non- availability of drugs. Table -3

179 **Table 3: Cancer and Alteration**

| Cancer and Alteration    | %   |
|--------------------------|-----|
| <b>Pancreatic Cancer</b> |     |
| CDK4- amplification      | 8%  |
| ERBB2- amplification     | 15% |
| KRAS- G12D               | 46% |
| MDM2- amplification      | 8%  |
| NF1- rearrangement       | 8%  |
| STK11- loss              | 8%  |

|                                                                            |     |
|----------------------------------------------------------------------------|-----|
| <b>Cervical Cancer</b>                                                     |     |
| MET- amplification/ ARID1A- S11fs*91                                       | 33% |
| PIK3CA                                                                     | 33% |
| PIK3CA-                                                                    | 33% |
| <b>Esophageal Cancer</b>                                                   |     |
| ARID1A- Y551fs*68                                                          | 33% |
| CCND1- amplification                                                       | 33% |
| ERBB2- amplification/ MYC- amplification                                   | 33% |
| <b>Gall Bladder Cancer</b>                                                 |     |
| (PD-L1)- amplification/ (PD-L2)- amplification/ KRAS- amplification,       | 25% |
| EGFR- amplification-equivocal/ NF1- F2156L                                 | 25% |
| ERBB2-amplification-                                                       | 50% |
| <b>Ovarian Cancer</b>                                                      |     |
| RAD51B- R47*                                                               | 25% |
| CBL- C381Y                                                                 | 25% |
| NF1- L190*/ MYC- amplification-equivocal/ TP53- R280*                      | 25% |
| <b>Prostate Cancer</b>                                                     |     |
| APC- F1954fs*16/ PIK3R1- T576del, rearrangement intron 7/ PTEN- loss       | 25% |
| AR- amplification/ CTNNB1- S45P- subclonal/ PTEN- loss/ RET- amplification | 25% |
| MYC- amplification/ TMPRSS2- TMPRSS2-ERG fusion                            | 25% |
| NF1- rearrangement intron 13                                               | 25% |
| <b>Rectal Cancer</b>                                                       |     |
| KRAS- G12C                                                                 | 25% |
| NRAS- Q61K                                                                 | 25% |
| RNF43- R221fs*39                                                           | 25% |

|                                                                                                           |     |
|-----------------------------------------------------------------------------------------------------------|-----|
| <b>Soft tissue sarcoma</b>                                                                                |     |
| CDK4- amplification/ MDM2- amplification/                                                                 | 60% |
| EWSR1- EWSR1-ATF1 fusion                                                                                  | 20% |
| PTEN- loss exons 3-9                                                                                      | 20% |
| <b>Thyroid cancer</b>                                                                                     |     |
| BRCA1- S1253fs*10/ AKT2- amplification/ AKT3- amplification-equivocal/ KEAP1- Y300*/ MTAP- loss exons 5-8 | 33% |
| NRAS- Q61R                                                                                                | 33% |
| RET- M918T/ NF1- W221*                                                                                    | 33% |
| <b>Uterine cancer</b>                                                                                     |     |
| PIK3CA                                                                                                    | 50% |
| FBXW7- R479*/ PIK3CA-                                                                                     | 17% |
| PIK3R1                                                                                                    | 17% |

180

## 181 **Discussion:**

182 The success in drug interaction associated with genomic alteration have led to implementation of  
183 NGS testing with the capability to sequence many genes for specific cancer in a short period of  
184 time. In real world medical practice NGS panel testing ordered by oncologist increasingly but  
185 still there is still controversy that whether molecular profiling is needed upfront in all the  
186 oncological patients, this issue is still unresolved [9]. In 2020 NGS recommendation were  
187 published which proposed that NGS testing must be focused on advanced cancer in which several  
188 molecular markers are relevant for the initial treatment like colon cancer, lung cancer,  
189 melanoma, unknown primary tumors [10]. Our current study have appraised the integration of



190 NGS into clinical perspective of patient care which can help in assessing therapeutic decision  
191 making among solid tumors.

192 Carcinoma of unknown primary always remains a unique challenge to the clinician as  
193 represented as a heterogenous group of malignancies with distinct disease course and biology.

194 Studies have shown that progress in genomic profiling elaborate further insight into downstream  
195 pathways and cellular system which further aid in subclassification into tumor origin that may  
196 sometime help as a therapeutic target [11]. retrospective study on CUP revealed that most  
197 common actionable alteration identified were PIK3CA, BRCA2, KRAS mutation, ERBB2  
198 amplification and high TMB. Median overall survival for those who treated with molecular  
199 guided therapy was 23.6 months as compared to historical data using conventional therapy [12].

200 In our study only 16% of patients with carcinoma of unknown primary found to have actionable  
201 alteration and of which 6% received molecular based treatment. Common mutations were  
202 BRAF/ MYC amplification, CDK-4 amplification, EGFR amplification, NF-1 loss.

203 In lung cancer (specifically stage IV Non-small cell lung cancer (NSCLC), molecular testing  
204 upfront before starting treatment has become standard of care. NGS though saves time and is  
205 cost- effective when we compared with gene testing done sequentially but in our resource  
206 constraint setting, we are obliged to get sequential testing in some patients. Presley et al. reported  
207 29% of actionable mutation via NGS testing [13] also report 61% targeted therapy usage [14].  
208 Our study revealed 55% of actionable target alteration which is similar to reported but only 30%  
209 of patients received genotype matched treatment which is either due to unavailability of drug or

210 non- affordability. Furthermore, our study did not compare survival outcome between patients  
211 undergoing NGS testing versus sequential molecular testing.

212 From the discovery of molecular biomarkers KRAS/NRAS in colon cancer with confers  
213 resistance to anti EGFR therapy we have moved to different molecular subtype of metastatic  
214 colorectal cancer with different treatment options. Therefore, molecular profiling became  
215 essential, and the guideline recommends that all the patients with metastatic colorectal cancer  
216 must be tested for . Our study also revealed that the most common mutation detected was  
217 KRAS/TP53 and 10% MSI-H with is similar to reported in the studies [15].

218 Improved outcomes were shown in cancer particularly lung cancer, clinical trial screening or rare  
219 cancer for making therapeutic decision association with NGS testing when it was performed  
220 initially. Median PFS was found to be almost a year in cancer patients with a good performance  
221 status and those with early in course of metastatic assessment as compared to those with rapidly  
222 progressing tumors and with poor performance status.

223 NGS testing impact actually has some limitation that it only focuses on gene alteration but has  
224 not taken into account the patient's general health and on the outcomes associated with test and  
225 also improvement in survival has not been addressed clearly. Our study although limited in  
226 sample size offers an overview of in which cancer subtype NGS is mostly ordered by oncologist.  
227 Our observation strengthens the need of NGS in advanced cancer and the need for improving the  
228 understanding of genomic drug association.

229 Our results show that the implementation of NGS analysis does support clinical decision  
230 making. However, the results are applicable in small percentage of patients. For better  
231 compliance and applicability, drug availability and cost of treatment need to be addressed.

232

233

234

## 235 **References**

- 236 1. Russnes HG, Navin N, Hicks J, Borresen-Dale AL. Insight into the heterogeneity of  
237 breast cancer through next-generation sequencing. *J Clin Invest*. 2011 Oct;121(10):3810-  
238 8. doi: 10.1172/JCI57088. Epub 2011 Oct 3. PMID: 21965338; PMCID: PMC3195464.
- 239 2. US Food and Drug Administration. Table of pharmacogenetic associations. Silver Spring,  
240 MD: US Food and Drug Administration; 2020.
- 241 3. Malapelle U, Vigliar E, Sgariglia R, Bellevicine C, Colarossi L, Vitale D, Pallante P,  
242 Troncone G. Ion Torrent next-generation sequencing for routine identification of  
243 clinically relevant mutations in colorectal cancer patients. *J Clin Pathol*. 2015  
244 Jan;68(1):64-8. doi: 10.1136/jclinpath-2014-202691. Epub 2014 Nov 5. PMID:  
245 25378536.
- 246 4. Levy SE, Boone BE. Next-Generation Sequencing Strategies. *Cold Spring Harb Perspect*  
247 *Med*. 2019 Jul 1;9(7):a025791. doi: 10.1101/cshperspect.a025791. PMID: 30323017;  
248 PMCID: PMC6601457.

- 249 5. Holt S, Bertelli G, Humphreys I, Valentine W, Durrani S, Pudney D, Rolles M, Moe M,  
250 Khawaja S, Sharaiha Y, Brinkworth E, Whelan S, Jones S, Bennett H, Phillips CJ. A  
251 decision impact, decision conflict and economic assessment of routine Oncotype DX  
252 testing of 146 women with node-negative or pN1mi, ER-positive breast cancer in the  
253 U.K. *Br J Cancer*. 2013 Jun 11;108(11):2250-8. doi: 10.1038/bjc.2013.207. Epub 2013  
254 May 21. PMID: 23695023; PMCID: PMC3681004.
- 255 6. Coquerelle S, Darlington M, Michel M, Durand M, Borget I, Baffert S, Marino P, Perrier  
256 L, Durand-Zaleski I; NGSEco Group. Impact of Next Generation Sequencing on Clinical  
257 Practice in Oncology in France: Better Genetic Profiles for Patients Improve Access to  
258 Experimental Treatments. *Value Health*. 2020 Jul;23(7):898-906. doi:  
259 10.1016/j.jval.2020.03.005. Epub 2020 Jul 18. PMID: 32762992.
- 260 7. Jones TE, Zou J, Tseng GC, Roy S, Bhargava R. The Utility of Next-Generation  
261 Sequencing in Advanced Breast and Gynecologic Cancers. *Am J Clin Pathol*. 2021 Aug  
262 4;156(3):455-460. doi: 10.1093/ajcp/aqaa256. PMID: 33728425.
- 263 8. Suh KJ, Kim SH, Kim YJ, Shin H, Kang E, Kim EK, Lee S, Woo JW, Na HY, Ahn S,  
264 Jang BS, Kim IA, Park SY, Kim JH. Clinical Application of Next-Generation Sequencing  
265 in Patients With Breast Cancer: Real-World Data. *J Breast Cancer*. 2022 Oct;25(5):366-  
266 378. doi: 10.4048/jbc.2022.25.e30. Epub 2022 Jun 28. PMID: 35914747; PMCID:  
267 PMC9629971.
- 268 9. Dienstmann R, Lonardi S. Is upfront full molecular profiling needed in all patients with  
269 colorectal cancer in daily practice? *Lancet Oncol*. 2022 Sep;23(9):1129-1131. doi:  
270 10.1016/S1470-2045(22)00035-3. PMID: 36055302.

- 271 10. Colomer R, Mondejar R, Romero-Laorden N, Alfranca A, Sanchez-Madrid F, Quintela-  
272 Fandino M. When should we order a next generation sequencing test in a patient with  
273 cancer? *EClinicalMedicine*. 2020 Jul 31;25:100487. doi: 10.1016/j.eclinm.2020.100487.  
274 PMID: 32775973; PMCID: PMC7397394.
- 275 11. Oien KA. Pathologic evaluation of unknown primary cancer. *Semin Oncol*. 2009  
276 Feb;36(1):8-37. doi: 10.1053/j.seminoncol.2008.10.009. PMID: 19179185.
- 277 12. Fusco MJ, Knepper TC, Balliu J, Del Cueto A, Laborde JM, Hooda SM, Brohl AS, Bui  
278 MM, Hicks JK. Evaluation of Targeted Next-Generation Sequencing for the Management  
279 of Patients Diagnosed with a Cancer of Unknown Primary. *Oncologist*. 2022 Feb  
280 3;27(1):e9-e17. doi: 10.1093/oncolo/oyab014. PMID: 35305098; PMCID: PMC8842368.
- 281 13. Presley CJ, Tang D, Soulos PR, Chiang AC, Longtine JA, Adelson KB, Herbst RS, Zhu  
282 W, Nussbaum NC, Sorg RA, Agarwala V, Abernethy AP, Gross CP. Association of  
283 Broad-Based Genomic Sequencing With Survival Among Patients With Advanced Non-  
284 Small Cell Lung Cancer in the Community Oncology Setting. *JAMA*. 2018 Aug  
285 7;320(5):469-477. doi: 10.1001/jama.2018.9824. PMID: 30088010; PMCID:  
286 PMC6142984.
- 287 14. Al-Ahmadi A, Ardeshir-Larijani F, Fu P, Cao S, Lipka MB, Dowlati A, Bruno DS. Next  
288 Generation Sequencing of Advanced Non-Small Cell Lung Cancer: Utilization Based on  
289 Race and Impact on Survival. *Clin Lung Cancer*. 2021 Jan;22(1):16-22.e1. doi:  
290 10.1016/j.clcc.2020.08.004. Epub 2020 Sep 18. PMID: 33397584..
- 291 15. Bayle A, Basile D, Garinet S, Rance B, Laurent-Puig P, Blons H, Taieb J, Perkins G.  
292 Next-Generation Sequencing Targeted Panel in Routine Care for Metastatic Colon

293           Cancers. Cancers (Basel). 2021 Nov 17;13(22):5750. doi: 10.3390/cancers13225750.  
294           PMID: 34830904; PMCID: PMC8616114.
